# Supplementary material
Source: PubMed Central journal article supplement (PMC7331091)
Supplement: NIHMS1594161-supplement-Supplementary_Material.pdf [file NIHMS1594161-supplement-Supplementary_Material.pdf]

| Variable (Source)                                     | Description                                                                                                                                      |
|-------------------------------------------------------|--------------------------------------------------------------------------------------------------------------------------------------------------|
| <b>Spatial visualization</b>                          |                                                                                                                                                  |
| Form boards (Ekstrom, French, Harman, & Dermen, 1976) | Select which smaller shapes are need to create a larger shape                                                                                    |
| Paper folding (Ekstrom et al., 1976)                  | Select the pattern that would result from a series of paper folds and hole punches                                                               |
| Spatial relations (Bennett, Seashore, & Wesman, 1997) | Evaluate the correspondence between a 3-D figure and several 2-D figures                                                                         |
| <b>Reasoning</b>                                      |                                                                                                                                                  |
| Matrix reasoning (Raven, 1962)                        | Select which pattern best completes a missing cell in a matrix                                                                                   |
| Shiplely abstraction (Zachary, 1986)                  | Determine which answer best completes a sentence or sequence of information                                                                      |
| Letter sets (Ekstrom et al., 1976)                    | Select which letter string is different from among five sets of letter strings                                                                   |
| <b>Memory</b>                                         |                                                                                                                                                  |
| Paired associates (Salthouse, Fristoe, & Rhee, 1996)  | Number of words recalled after the presentation of the first word of a previously presented pair                                                 |
| WMS Word recall (Wechsler, 1997b)                     | Number of words recalled from a list of 12 unrelated words, across 4 trials                                                                      |
| WMS Logical memory (Wechsler, 1997b)                  | Amount of information recalled across three stories                                                                                              |
| <b>Processing speed</b>                               |                                                                                                                                                  |
| Letter comparison (Salthouse & Babcock, 1991)         | Participants presented with a series of pairs of letter strings and must determine whether they are the same or different as quickly as possible |
| Pattern comparison (Salthouse & Babcock, 1991)        | Participants presented with a series of pairs of line patterns and must determine whether they are the same or different as quickly as possible  |

WAIS Digit Symbol (Wechsler, 1997a)

Participants provided with a table with digits associated with numbers and then must write the appropriate symbol for each provided number as quickly as possible

Vocabulary

Antonym vocabulary (Salthouse, 1993)

Select the word from a set of five words that is the best antonym of a target word

Synonym vocabulary (Salthouse, 1993)

Select the word from a set of five words that is the best synonym of a target word

WAIS vocabulary (Wechsler, 1997a)

Provide a definition of each target word

WJ-R picture vocabulary (Woodcock & Johnson, 1990)

Number of pictures correctly identified

---
